# Supplementary material for: Wind-like sonification of footsteps for walking rehabilitation in individuals with chronic stroke: A multiple case study
Source: Research Square preprint supplement (doi:10.21203/rs.3.rs-8022957/v1), 2025-12-03
Supplement: Supplementary file 1 [file 4a5eedfb3a4be9dca9314217.docx]

**Supplementary materials**

**Table 1.** **Performance in walking conditions and dual cognition tasks.**

|  | **Focused attention during gait** | | | | | | **Selective attention during gait** | | | | | | | **Working memory, cognitive flexibility during gait** | | | | | |
| --- | --- | --- | --- | --- | --- | --- | --- | --- | --- | --- | --- | --- | --- | --- | --- | --- | --- | --- | --- |
| **Conditions** | **WIND** | | **Mean (SD)** | **MECHANICAL** | | **Mean (SD)** | **WIND** | | **Mean (SD)** | **MECHANICAL** | | **Mean (SD)** | **WIND** | | | **Mean (SD)** | **MECHANICAL** | | **Mean (SD)** |
|  | WTTMT-n PRE | WTTMT-n POST |  | WTTMT-n PRE | WTTMT-n POST |  | WTTMT-a PRE | WTTMT-a POST |  | WTTMT-a PRE | WTTMT-a POST |  | WTTMT-b PRE | | WTTMT-b POST |  | WTTMT-b PRE | WTTMT-b POST |  |
| **S_01** | 43.01 | 51.00 | 47.01 (5.65) | 22.00 | 23.00 | 22.50 (0.70) | 82.00 | 65.00 | 73.50 (12.02) | 29.00 | 29.00 | 29.00 (0.0) | 182.00 | | 147.00 | 164.50 (24.74) | 68.00 | 63.00 | 65.50 (3.53) |
| **S_02** | 26.00 | 17.20 | 21.60 (6.22) | 24.00 | 16.00 | 20.00 (5.65) | 36.02 | 22.20 | 29.11 (9.77) | 22.00 | 24.00 | 23.00 (1.41) | 102.00 | | 41.54 | 71.77 (42.75) | 38.00 | 61.00 | 49.50 (16.26) |
| **S_03** | 14.00 | 11.00 | 12.50 (2.12) | 13.00 | 15.75 | 14.38 (1.94) | 21.00 | 13.00 | 17.00 (5.65) | 17.00 | 16.51 | 17.00 (5.65) | 65.00 | | 24.00 | 44.50 (28.99) | 35.00 | 21.84 | 28.42 (9.30) |

Note: We use data raw to show the performance in walking conditions and dual cognition tasks. SD=Standard deviation

**Table 2. Emotional and affective scales**

|  |  | **S_01** | | **S_02** | | | **S_03** | |
| --- | --- | --- | --- | --- | --- | --- | --- | --- |
|  |  | **Wind** | **Mechanical** | **Wind** | **Mechanical** | | **Wind** | **Mechanical** |
| Self-estem | Rosenberg scale | 35-31 (0%) | 37-33  (-133%) | 29-37 (72%) | | 37-37 (0%) | 38-40 (10%) | 39-36  (-300%) |
| Mood state | Profile of Mood States (POMS) | 45-76 (14%) | 30-20  (-4%) | 40-77 (17%) | | 34-34 (0%) | 46-76 (14%) | 41-31  (-4%) |
| Depression symptom | Yesavage scale | 4-3 (25%) | 2-2  (0%) | 4-6  (-50%) | | 5-2 (60%) | 3-0 (100%) | 0-1  (0%) |
| Anxiety symptom | GAD-7 scale | 5-3 (40%) | 0-1  (0%) | 1-1  (0%) | | 0-1  (0%) | 2-0 (100%) | 1-0 (100%) |

Note: Each cell reports the difference between Evaluation 1 and Evaluation 2, expressed as a percentage of treatment effectiveness. For the Rosenberg Self-Esteem Scale and POMS, we used the following formula to calculate the percentage of treatment effectiveness:
Formula 1: (Post-treatment value – baseline value) / (Maximum possible value – Baseline value) ×100

This formula was applied because higher scores on this scale indicate higher self-esteem.

In contrast, for the Yesavage Depression Scale and the GAD-7, we applied a different formula, as lower scores on these scales indicate fewer symptoms (i.e., improvement):
 Formula 2: (Pre-treatment value – post-treatment value) / (Pre-treatment value – Minimum score) ×100

In emotional and psychological measures, changes in self-esteem were observed in S_02 and S_03 during wind training; S_01 and S_03 experienced a decline during mechanical sound therapy. In relation to mood state, the wind sound therapy benefits all patients between 14-17% in contrast to the mechanical sound that does not generate change in S_02, but in S_01 and S_03 generate a decrease of mood state.

In terms of depressive symptoms, S_01 and S_03 reported improvement during wind sound therapy, whereas symptoms worsened during mechanical sound. Conversely, S_02 showed improvement under mechanical sound and worsening during wind sound. In respect to anxiety symptoms decreased in S_01 and S_03 during wind sound therapy, while S_02 maintained a non-anxious status.
